# 1           **The primary transcriptome, small RNAs, and regulation of** 2           **antimicrobial resistance in *Acinetobacter baumannii***

3 Carsten Kröger<sup>1\*</sup>, Keith D. MacKenzie<sup>2</sup>, Ebtihal Y. Al-Shabib<sup>2</sup>, Morgan W. B. Kirzinger<sup>2</sup>, Danae  
4 M. Suchan<sup>2</sup>, Tzu-Chiao Chao<sup>2</sup>, Valentyna Akulova<sup>2</sup>, Alesksandra A. Miranda-CasoLuengo<sup>1</sup>,  
5 Vivian A. Monzon<sup>1</sup>, Tyrrell Conway<sup>5</sup>, Sathesh K. Sivasankaran<sup>6</sup>, Jay C. D. Hinton<sup>3</sup>, Karsten  
6 Hokamp<sup>4</sup>, and Andrew D. S. Cameron<sup>2\*</sup>

7 <sup>1</sup> Department of Microbiology, School of Genetics & Microbiology, Moyne Institute of  
8 Preventive Medicine, Trinity College Dublin, Dublin 2, Ireland

9 <sup>2</sup> Institute for Microbial Systems and Society, Department of Biology, University of Regina,  
10 Regina, Saskatchewan, S4S 0A2, Canada.

11 <sup>3</sup> Institute of Integrative Biology, University of Liverpool, Liverpool L69 7ZB, UK.

12 <sup>4</sup> Department of Genetics, School of Genetics & Microbiology, Smurfit Institute of Genetics,  
13 Trinity College Dublin, Dublin 2, Ireland

14 <sup>5</sup> Department of Microbiology and Molecular Genetics, Oklahoma State University, Stillwater,  
15 OK 74078, USA

16 <sup>6</sup> John P. Hussman Institute for Human Genomics, Miller School of Medicine, University of  
17 Miami, Miami, Florida, USA

18 Correspondence: [Carsten.Kroeger@tcd.ie](mailto:Carsten.Kroeger@tcd.ie) & [Andrew.Cameron@uregina.ca](mailto:Andrew.Cameron@uregina.ca)

## 19 **Key words**

20 *Acinetobacter baumannii*

21 Differential (d)RNA-seq

22 Small RNA

23 Antibiotic resistance

24 *craA* efflux pump

## 25 **ABSTRACT**

26           We present the first high-resolution determination of transcriptome architecture in the  
27 priority pathogen *Acinetobacter baumannii*. Pooled RNA from 16 laboratory conditions was used  
28 for differential RNA-seq (dRNA-seq) to identify 3731 transcriptional start sites (TSS) and 110  
29 small RNAs, including the first identification in *A. baumannii* of sRNAs encoded at the 3' end of  
30 coding genes. Most sRNAs were conserved among sequenced *A. baumannii* genomes, but were  
31 only weakly conserved or absent in other *Acinetobacter* species. Single nucleotide mapping of  
32 TSS enabled prediction of -10 and -35 RNA polymerase binding sites and revealed an  
33 unprecedented base preference at position +2 that hints at an unrecognized transcriptional  
34 regulatory mechanism. To apply functional genomics to the problem of antimicrobial resistance,  
35 we dissected the transcriptional regulation of the drug efflux pump responsible for  
36 chloramphenicol resistance, *craA*. The two *craA* promoters were both down-regulated >1000-fold

37 when cells were shifted to nutrient limited medium. This conditional down-regulation of *craA*  
38 expression renders cells sensitive to chloramphenicol, a highly effective antibiotic for the treatment  
39 of multidrug resistant infections. An online interface that facilitates open data access and  
40 visualization is provided as “AcinetoCom” (<http://bioinf.gen.tcd.ie/acinetocom/>).

## 41 INTRODUCTION

42 In 2017, the World Health Organization (WHO) ranked carbapenem-resistant *A. baumannii* a top  
43 priority critical pathogen in the WHO’s first-ever list of priority antimicrobial-resistant pathogens  
44 (1). It is estimated that one million *A. baumannii* infections occur worldwide each year, causing  
45 15,000 deaths (2). In the United States, *A. baumannii* is responsible for more than 10% of  
46 nosocomial infections, and causes a variety of diseases such as ventilator-associated pneumonia,  
47 bacteraemia, skin and soft tissue infections, endocarditis, urinary tract infections and meningitis  
48 (3). Despite the urgency to develop new antimicrobial drugs, we know little about *A. baumannii*  
49 infection biology and virulence mechanisms because only a few *A. baumannii* virulence genes and  
50 their regulation have been functionally studied (4).

51 Characterizing the transcriptional landscape and simultaneously quantifying gene  
52 expression on a genome-wide scale using RNA sequencing (RNA-seq) is a cornerstone of  
53 functional genomic efforts to identify the genetic basis of cellular processes (5). Given that RNA-  
54 seq identifies transcripts for the entire genome at single-nucleotide resolution in a strand-specific  
55 fashion, it is the ideal tool to uncover transcriptome features. Recent technical enhancements to  
56 RNA-seq enable improved delineation of transcriptional units to localize transcriptional start sites,  
57 transcript ends, sRNAs, antisense transcription and other transcriptome features (5, 6). The ability  
58 to quantify gene expression and characterize transcripts from any organism is particularly valuable  
59 for the study of emerging bacterial pathogens, where research knowledge lags behind the global  
60 spread, health burden, and economic impacts of disease.

61 To address the lack of basic biological insight of *A. baumannii*, we used a functional  
62 genomics approach to investigate the transcriptome architecture of *A. baumannii* ATCC 17978  
63 and to study virulence gene expression and antibiotic resistance in this priority pathogen. *A.*  
64 *baumannii* ATCC 17978 is one of the best-studied strains of *Acinetobacter*, and is a useful model  
65 for genetic manipulation due to its natural sensitivity to most antibiotics used in the laboratory (7,  
66 8). Differential RNA-seq (dRNA-seq) facilitates the precise identification of TSS by  
67 distinguishing 5’-triphosphorylated (i.e. newly synthesized, “primary” transcripts) and other 5’-  
68 termini (such as processed or dephosphorylated) of RNA species (9). dRNA-seq analysis of  
69 transcription in virulence-relevant conditions, antimicrobial challenge, and standard laboratory  
70 culture generated a high-resolution map of TSS and small RNAs in the *A. baumannii* chromosome,  
71 revealing the precise location of 3731 promoters and 110 small RNAs. This comprehensive view  
72 of TSS identified two promoters that regulate chloramphenicol resistance by the CraA efflux pump  
73 and we discovered growth conditions that stimulate low *craA* expression and render *A. baumannii*  
74 sensitive to chloramphenicol. To facilitate similar discoveries by the research community, we

75 created the online resource AcinetoCom (<http://bioinf.gen.tcd.ie/acinetocom/>) for free and  
76 intuitive exploration of the *A. baumannii* transcriptome.

## 77 **MATERIALS AND METHODS**

### 78 **Bacterial strains and growth conditions.**

79 *Acinetobacter baumannii* ATCC 17978 was obtained from LGC-Standards-ATCC. We used the  
80 reference strain containing all three plasmids (pAB1, pAB2, pAB3) for dRNA-seq analysis. RNA-  
81 seq revealed that pAB3 was absent in the strain used for early stationary phase transcriptome  
82 analysis, indicating that pAB3 was lost during shipping of ATCC 17978 between our laboratories.  
83 Comparing RNA-seq reads to the reference genome did not detect any point mutations in the  
84 derivative strain lacking pAB3.

85 Cells were grown overnight in 5 mL Lennox (L-) broth (10 g L<sup>-1</sup> tryptone, 5 g L<sup>-1</sup> yeast  
86 extract, 5 g L<sup>-1</sup> NaCl; pH 7.0), sub-cultured the next morning (1:1,000) in 250 ml flasks containing  
87 25 ml L-broth, and grown at 37°C with shaking at 220 RPM in a waterbath. Early stationary phase  
88 (ESP) samples were collected when cultures reached an OD<sub>600</sub> of 2.0 in L-broth. Cell cultures were  
89 exposed to several additional growth conditions and environmental shocks to induce gene  
90 expression and obtain RNA for the “pool sample”; these conditions are described in the subsequent  
91 sentences and summarized in Table 1. In addition to sampling colonies from L-agar plates  
92 incubated at 37°C, cells were sampled at select culture densities during growth in L-broth in  
93 shaking flasks (OD<sub>600</sub> values of 0.25, 0.75, 1.8, 2.5 and 2.8). Exponentially-growing cultures  
94 (OD<sub>600</sub> of 0.3) were exposed to different environmental shocks for 10 minutes, including 250 µL  
95 of a 1:100 dilution of disinfectant (Distel 'High Level Medical Surface Disinfectant', non-  
96 fragrances), hydrogen peroxide to a final concentration of 1 mM, ethanol to a final concentration  
97 (v/v) of 2%, kanamycin to a final concentration of 50 µg mL<sup>-1</sup>, NaCl to a final concentration of  
98 0.3 M or 2,2'-dipyridyl to a final concentration of 0.2 mM. Cells were also cultured in M9 minimal  
99 medium containing 1 mM MgSO<sub>4</sub>, 0.1 mM CaCl<sub>2</sub> and a carbon source of either 31.2 mM fumarate  
100 or 33.3 mM xylose. To mimic growth in environmental conditions, cells were grown at low  
101 temperatures (25°C) until an OD<sub>600</sub> of 0.3. Additional cells were also grown at 25°C to an OD<sub>600</sub>  
102 of 0.3 before cultures were switched to growth at an ambient temperature of 37°C for 10 minutes.

### 103 **RNA extraction, ribosomal RNA depletion, DNase digestion and the RNA pool.**

104 Total RNA was isolated from *A. baumannii* ATCC 17978 cells using TRIzol as described  
105 previously for *Salmonella enterica* serovar Typhimurium (10). The RNA quality was analyzed  
106 using an Agilent Bioanalyzer 2100 and RNA concentration was measured on a NanoDrop™  
107 spectrophotometer or the Qubit™ (Invitrogen). The ESP RNA samples were depleted for  
108 ribosomal RNA using the RiboZero rRNA Removal Kit Bacteria (Illumina), and contaminating  
109 DNA was digested with DNaseI using the TURBO DNA-free™ kit (Ambion). To generate the  
110 RNA pool, equal amounts of RNA from each condition were combined into a single sample.

## 111 **Library preparation for next generation sequencing.**

112 Libraries from three biological replicates of the ESP condition were prepared using the  
113 NEBNext™ Ultra RNA Library Prep Kit for Illumina (NEB) according to the manufacturer's  
114 instructions. These libraries were sequenced on an Illumina MiSeq (paired-end reads). The  
115 libraries of the pooled RNA sample for dRNA-seq were prepared by vertis Biotechnologie AG  
116 (Freising, Germany) and sequenced on an Illumina NextSeq machine (single reads). For dRNA-  
117 seq, RNA samples were digested with Terminator Exonuclease (TEX) prior to cDNA library  
118 preparation (9, 11). We noted that for highly-expressed genes in the ESP samples, there were  
119 distinct transcripts mapped to the opposite strand that perfectly mirrored the expected transcript.  
120 This is best explained by incomplete depletion of non-template strand (second strand incorporated  
121 dUTP) by the USER enzyme during library preparation with NEBNext™ Ultra. Therefore, we  
122 considered only the pooled RNA-seq data from Vertis Biotechnologie AG, which is generated by  
123 an RNA adaptor ligation step before cDNA synthesis, to determine the amount of antisense  
124 transcription.

## 125 **Mapping of sequencing reads, statistics and analysis.**

126 The original genome sequence for *A. baumannii* ATCC 17978 identified two plasmids (pAB1 and  
127 pAB2) (7). However, it was subsequently revealed that ATCC 17978 carries a third plasmid  
128 (pAB3) that was incorrectly assembled as chromosome sequence in the first assembly (12), thus  
129 the *A. baumannii* ATCC 17978-mff genome (accession: NZ\_CP012004.1) was used as a reference  
130 sequence in our study. DNA sequencing reads were mapped using bowtie2 with the `-local -very-`  
131 `sensitive` settings for use of soft-clipping and maximum sensitivity (13). Conversion into BAM  
132 and BigWig files was carried out using SAMtools (14) and Galaxy at galaxy.org (15). Mapped  
133 reads were visualized in the Integrated Genome Browser (16) and Jbrowse (17). Number of  
134 sequence reads mapped were (the underscore indicates the biological replicate) ESP\_1  
135 (10,588,403; mapped uniquely: 8,403,658), ESP\_2 (9,374,114; mapped uniquely: 6,769,516),  
136 ESP\_3 (11,121,847; mapped uniquely: 7,891,371), RNA\_pool (66,853,984; mapped uniquely:  
137 19,607,931) and dRNA-seq\_Pool (77,237,102; mapped uniquely: 30,041,320). The difference in  
138 percentage of uniquely mapped reads of the ESP conditions and the Pool samples is caused by the  
139 fact that RNA from the ESP condition was depleted for rRNA, while the RNA samples of the RNA  
140 Pool were not. FeatureCounts was used to summarize read counts for each annotated feature (18).  
141 These values were transformed into transcripts per million reads (TPM) following the formula  
142 provided by Li *et al.* (19); (Table S4).

## 143 **Data availability**

144 The raw data and normalized mapped reads are available from the Gene Expression Omnibus  
145 (GEO) at accession no: GSE103244.

## 146 **Identification and categorization of transcriptional start sites (TSS).**

147 Before the identification of TSS, the coverage files for the RNA Pool and TEX-digested RNA Pool  
148 sample were normalized to account for different library sizes. The number of mapped nucleotides  
149 for each position was divided by the number of uniquely mapped reads of the smallest library  
150 (ESP\_2) and then multiplied by the number of reads for the library being normalized. The locations  
151 of TSS were predicted with TSSpredator (20) using the default settings with the exception of  
152 changing the step height option to 0.2, the 5' UTR length to 400 and the enrichment factor to 1.5.  
153 The locations of the predicted TSS were manually inspected in IGB and Jbrowse. TSS that exist  
154  $\leq 400$  nt upstream of the start of a coding region and TSS of non-coding RNA genes were classified  
155 as Primary or Secondary TSS; in cases where multiple candidate TSS are upstream, the TSS  
156 associated with the strongest expression was designated as the Primary TSS, while all additional  
157 TSS were designated Secondary TSS. TSS with intragenic location on the sense strand were  
158 classified as Internal TSS and when located on the antisense strand as Antisense TSS. TSS were  
159 classified as Orphan if they could not be assigned to any other category. Occasionally, manual  
160 curation changed the classification of TSS, e.g. five genes with a 5'UTR  $>400$  nt were classified  
161 as Primary or Secondary (Table S2).

## 162 **Identification of -10 and -35 sigma factor motifs.**

163 DNA sequences upstream of all transcription start sites were extracted in two blocks of  
164 nucleotides: between position -3 to -18 (-10 block) and between -16 to -50 (-35 block). Each  
165 block was searched with the unbiased motif finding program MEME 4.11.2 (21). Each sequence  
166 block was searched with the following settings: one occurrence per sequence with a width of 6-12  
167 bp (-10 motif) or 4-10 bp (-35 motif). Sequence logos were generated by WebLogo (22).

## 168 **Identification of candidate sRNA genes and prediction of transcription terminators.**

169 The identification of candidate sRNA genes was carried out manually in IGB and Jbrowse. A new  
170 candidate sRNA gene was assigned if a short ( $<500$  nt) unannotated transcript was observed in the  
171 RNA-seq data. The borders of the transcript were informed by the location of TSS determined by  
172 dRNA-seq data and the location of predicted Rho-independent transcription terminators using  
173 ARNold with the default setting (23).

## 174 **sRNA conservation analysis.**

175 The conservation of candidate sRNA genes was investigated using GLSEARCH (24). The genome  
176 sequences were obtained from NCBI (*Acinetobacter baumannii* Ab04-mff (NZ\_CP012006.1),  
177 *Acinetobacter baumannii* AB030 (NZ\_CP009257.1), *Acinetobacter baumannii* AB0057  
178 (NC\_011586.1), *Acinetobacter baumannii* AB5075-UW (NZ\_CP008706.1), *Acinetobacter*  
179 *baumannii* ACICU (NC\_010611.1), *Acinetobacter baumannii* strain ATCC 17978  
180 (NZ\_CP018664.1), *Acinetobacter baumannii* ATCC 17978-mff (NZ\_CP012004.1),  
181 *Acinetobacter baumannii* str. AYE (NC\_010410.1), *Acinetobacter baumannii* IOMTU 433

182 (NZ\_AP014649.1), *Acinetobacter baumannii* LAC-4 (NZ\_CP007712.1), *Acinetobacter*  
183 *baumannii* A1 (NZ\_CP010781.1), *Acinetobacter baumannii* USA15 (NZ\_CP020595.1),  
184 *Acinetobacter baumannii* XH386 (NZ\_CP010779.1), *Acinetobacter baumannii* TYTH-1  
185 (NC\_018706.1), *Acinetobacter baumannii* XDR-BJ83 (NZ\_CP018421.1), *Acinetobacter baylyi*  
186 DSM 14961 (NZ\_KB849622.1-NZ\_KB849630.1), *Acinetobacter equi* 114 (NZ\_CP012808.1),  
187 *Acinetobacter haemolyticus* CIP 64.3 (NZ\_KB849798.1-KB849812.1), *Acinetobacter lwoffii*  
188 NCTC 5866 (NZ\_KB851224.1-NZ\_KB851239.1), *Acinetobacter nosocomialis* 6411  
189 (NZ\_CP010368.1), *Acinetobacter pittii* PHEA-2 (NC\_016603.1), *Acinetobacter venetianus* VE-  
190 C3 (NZ\_CM001772.1), *Moraxella catarrhalis* BBH18 (NC\_014147.1), *Pseudomonas aeruginosa*  
191 PAO1 (NC\_002516.2), *Pseudomonas fluorescens* F113 (NC\_016830.1), *Pseudomonas putida*  
192 KT2440 (NC\_002947.4), *Pseudomonas syringae* pv. *syringae* B728a (NC\_007005.1). The score  
193 shows percentage sequence identity with the reference sequence (*A. baumannii* 17978-mff).

#### 194 **Northern blotting.**

195 Northern blotting was performed using the DIG Northern Starter Kit (Roche) using DIG-labelled  
196 riboprobes generated by *in vitro* transcription as described earlier and according to the  
197 manufacturer's instructions (10). Templates for *in vitro* transcriptions using T7 RNA polymerase  
198 were generated by PCR using DNA oligonucleotides listed in Table S1. Five  $\mu\text{g}$  of total RNA was  
199 separated on a 7% urea-polyacrylamide gel in 1x Tris-borate-EDTA (TBE) buffer cooled to 4°C.  
200 Band sizes on the Northern blots were compared with Low Range single strand RNA ladder  
201 (NEB). After blotting and UV crosslinking, the lane with the ladder was cut off, stained with 0.1%  
202 methylene blue solution for 1 min at room temperature, destained in sterile water, and re-attached  
203 to the membrane before detection of chemiluminescent bands using an ImageQuant LAS4000  
204 imager (GE Healthcare).

#### 205 **Chloramphenicol sensitivity and *craA* expression analysis.**

206 Cells were cultured overnight in L-broth containing 25  $\mu\text{g mL}^{-1}$  chloramphenicol and the next  
207 morning inoculated to OD<sub>600</sub> 0.05 in 20 mL fresh medium and grown to OD<sub>600</sub> of 0.3 in a 250-mL  
208 flask with shaking at 37 °C. Cells were captured on 0.2  $\mu\text{m}$  analytical test filter funnels (Nalgene),  
209 washed with M9 containing 20 mM pyruvate as the carbon source and the filter (retaining the cells)  
210 was transferred to M9 plus pyruvate. The cells were washed off the filter and inoculated in fresh  
211 20 mL M9 plus pyruvate medium at an OD<sub>600</sub> of 0.1 and incubated at 37°C with shaking for 5  
212 days. Sampling for qPCR and chloramphenicol resistance was performed at t = 0, 4h, 24h, 48h,  
213 and 96h and transcription was stopped by the addition of phenol:ethanol stop solution (25, 26).  
214 For qPCR, total RNA was isolated from cultures using the EZ-10 Spin Column Total RNA Mini-  
215 Preps Super Kit (BioBasic) and purity and quality was assessed by 1% agarose gel electrophoresis.  
216 For each sample, 5  $\mu\text{g}$  total RNA was DNase treated in a 50  $\mu\text{L}$  reaction using the Turbo DNA-  
217 free kit (AMBION), and cDNA templates were synthesized by random priming 0.5  $\mu\text{g}$  RNA in a  
218 20  $\mu\text{L}$  reaction using Verso cDNA synthesis kit (Fisher). PCR reactions were carried out in  
219 duplicate with each primer set on an ABI StepOnePlus PCR System (Applied Biosystems) using

220 Perfecta SYBR Fastmix with ROX (Quanta Biosciences). Standard curves were included in every  
221 qPCR run; standard curves were generated for each primer set using five serial ten-fold dilutions  
222 of *A. baumannii* genomic DNA. Quantitative PCR (qPCR) primers are listed in Table S1. Viable  
223 counts were performed by serial dilution and drop-plating on L-agar plates without or with  
224 chloramphenicol ( $10 \mu\text{g mL}^{-1}$ ); colony forming units were counted after overnight incubation at  
225  $37^\circ\text{C}$ .

## 226 RESULTS AND DISCUSSION

### 227 Global identification of *A. baumannii* transcriptional start sites

228 To generate a comprehensive list of transcriptional start sites for *A. baumannii*, we adopted the  
229 technique developed for *Salmonella* Typhimurium in which diverse laboratory conditions were  
230 used to elicit transcription activation from as many gene promoters as possible (11). Thus, we  
231 selected 16 conditions that reflect the environments experienced by *A. baumannii* during infection,  
232 environmental survival, and general stress (Table 1). Specifically, *A. baumannii* was cultured in  
233 L-broth and sampled throughout growth at OD<sub>600</sub> 0.25, 0.75, 1.8, 2.5, 2.8, in L-broth at  $25^\circ\text{C}$ , in  
234 liquid M9 minimal medium with different sole carbon sources (xylose, fumarate), and grown on  
235 an L-agar plate for 16 hours. We also isolated RNA from several “shock” conditions, including  
236 disinfectant shock, osmotic shock (addition of sodium chloride), limitation of iron availability  
237 (addition of 2,2'-dipyridyl), translational stress (addition of kanamycin), oxidative stress (addition  
238 of hydrogen peroxide), temperature shift from ambient to body temperature ( $25^\circ\text{C}$  to  $37^\circ\text{C}$ ), and  
239 the addition of ethanol (which increases virulence in *A. baumannii* infection of *Dictyostelium*  
240 *discoideum* and *Caenorhabditis elegans* (27)). Total RNA was isolated from the 16 conditions,  
241 pooled, and used as a single sample.

242 To enrich for primary transcripts, the pooled sample was digested with Terminator  
243 Exonuclease (TEX) (9). Over 20 million mapped sequencing reads were analyzed with  
244 TSSpredator software (20) and manually inspected with Integrated Genome Browser (IGB) and  
245 Jbrowse (16, 17) to define the genomic location of 3731 TSS (Fig. 1). In addition, three biological  
246 replicates of RNA isolated from OD<sub>600</sub> 2.0 (early stationary phase (ESP)) yielded over 6.7 million  
247 mapped reads for each of the ESP biological replicates and the >20 million mapped reads for the  
248 RNA pool provided sufficient depth to cover the bacterial transcriptome (28).

249 TSS were categorized according to their locations relative to coding sequences (Fig. 2A).  
250 Of 3731 TSS, 1079 (~29%) were primary and 153 (~4%) were secondary TSS (Fig. 2B and Table  
251 S2). Manual curation of the TSS predictions determined that five TSS had a 5' UTR longer than  
252 400 nt; these likely represent unusually long 5' UTRs, but could encode small open reading frames  
253 missed during automated gene annotation (Fig. 2C). About 18% (679) of transcripts were initiated  
254 from inside of coding regions (i.e. internal TSS). An internal TSS can drive expression of  
255 downstream genes, e.g. the promoter of DNA gyrase B-encoding gene (*gyrB*) lies within the ORF  
256 located upstream encoding DNA recombination protein RecF. The biological role of internal  
257 promoters that do not drive the expression of a downstream gene is unclear, however, a subset  
258 initiates the expression of small RNAs located at the 3'-end of coding genes (see below).

259 TSSpredator predicted that almost half (~47%, 1764/3731) of the identified TSS are located  
260 antisense of coding regions. Manual inspection revealed that the large majority of antisense TSS  
261 produce very short (<100 nt) and low-copy transcripts. The function of these short antisense  
262 transcripts is debated and a portion might be considered as non-functional transcripts that are  
263 initiated at promoter-like sequences (29, 30). However, an increasing number of studies suggest  
264 that pervasive transcription (including short antisense transcripts) exhibit biological roles (31). The  
265 ~1.5% (56/3731) of TSS that do not have a clear association with an annotated genomic feature  
266 were categorized as orphan TSS.

### 267 ***A. baumannii* promoter architecture**

268 To initiate transcription, a sigma factor directs binding of RNA polymerase to DNA within 50 nt  
269 upstream of a TSS (32). We determined the consensus promoter structure upstream of the 3731  
270 TSS using unbiased motif searching to detect TSS-proximal and TSS-distal motifs corresponding  
271 to the -10 and -35 locations of sigma factor binding sites. Because the spacing between -10 and  
272 -35 binding sites differs between promoters, we searched for each motif separately; constraining  
273 a specific spacing between -10 and -35 elements prevents resolution of the weaker motifs located  
274 around the -35 position. MEME searching identified canonical RpoD (sigma 70) binding site  
275 motifs in both the -10 and -35 locations (Fig. 2D), consistent with the expectation that RpoD is  
276 responsible for a large majority of transcription initiation in *A. baumannii*. Aligning all 3731 *A.*  
277 *baumannii* TSS revealed that adenine is the most common initiating nucleotide (A=47 %) (Fig.  
278 2C). The majority of transcripts initiate with a purine nucleotide triphosphate (ATP= 47 %, GTP=  
279 23 %); these are the primary energy storage molecules and thus provide a mechanism to regulate  
280 transcription initiation. Yet it is position +2 that has the strongest sequence bias (T=57  
281 %). Pyrimidine nucleotides are less abundant in cells, and the preference for pyrimidine  
282 nucleotides at the -1 (72 % C+T) and +2 (81 % C+T) positions immediately flanking the TSS may  
283 represent a mechanism that reduces accidental transcription initiation from these flanking positions  
284 (10).

285 Untranslated regions (UTR) of mRNA perform multiple biological functions, including  
286 providing binding sites for ribosomes and the potential to fold into mRNA secondary structures  
287 that regulate transcription and RNA stability (33). The median length of 5' UTR for primary TSS  
288 is 37 nucleotides and secondary TSS is 100 nt (Fig. 2C). Similar UTR analyses have not been  
289 performed for the *E. coli* transcriptome; the median length of 5' UTR in *Salmonella* Typhimurium,  
290 another Gamma-proteobacterium, is 55 nt for primary TSS and 124 nt for secondary TSS (10).

### 291 **Identification of *A. baumannii* ATCC 17978 small RNAs**

292 Small, regulatory RNAs are a class of post-transcriptional regulators that modulate gene  
293 expression of many cellular processes (34, 35). Functions have been determined for some sRNAs  
294 in *Enterobacteriaceae* (e.g. *E. coli*, *Salmonella* Typhimurium), but no sRNA functions have been  
295 experimentally determined in *A. baumannii* (4). Two previous studies used bioinformatic and  
296 experimental approaches to locate small RNAs in *A. baumannii*. In *A. baumannii* MTCC 1425



297 (ATCC 15308), 31 sRNAs were predicted bioinformatically, of which three of which were verified  
298 by Northern blotting (36). In *A. baumannii* AB5075, RNA-seq analysis of exponential growth in  
299 lysogeny broth (LB) identified 78 sRNAs, six of which were verified by Northern blotting (37).  
300 Here, we employed dRNA-seq on pooled growth conditions for *de novo* detection of sRNA  
301 candidates; pooled RNA samples coupled with the high resolution determination of TSS has been  
302 shown to identify a greater number of sRNA per genome compared to traditional methods (11).  
303 Using the search criteria described in Material and Methods, sRNAs could occur within intergenic  
304 regions, antisense to known coding regions, or within the 3' end of mRNA. dRNA-seq provided  
305 the necessary resolution to detect TSS within the 3' end of coding genes. We identified a total of  
306 110 candidate sRNAs expressed by *A. baumannii* during ESP growth and in the pooled growth  
307 conditions (Table S3). As an example of sRNA annotation, mapped sequence reads of eight sRNAs  
308 is depicted in figure 3A. The majority (74/110; 67%) of sRNAs were in intergenic regions. The 3'  
309 regions of coding genes are increasingly recognized as genomic locations that can harbor sRNA  
310 genes (5, 38, 39). In *A. baumannii*, we identified 22 sRNAs that mapped to the 3' regions of coding  
311 genes, all of which possess their own promoters located within the upstream coding gene. We  
312 anticipate that there will be additional regulatory sRNAs produced by endo-nucleolytic processing  
313 of an mRNA, as observed in other bacteria (39). However, additional experiments are required to  
314 annotate such sRNAs effectively (39). Only a small number (14/110; 13%) of sRNAs were located  
315 antisense of coding genes.

316 We used Northern blots to validate sRNA annotations (Fig. 3). Sequence-specific  
317 riboprobes were designed to hybridize to two families of homologous sRNAs and five randomly  
318 selected unique sRNA candidates, including one sRNA (sRNA17) located in the 3' region of  
319 ACX60\_03050, a predicted TonB-dependent receptor protein. Eighteen of the 110 sRNA  
320 candidates were homologs (i.e. present as 18 copies with highly similar nucleotide sequence),  
321 which we classified as “group I sRNAs” (Fig. 3B). Gene duplications are common amongst sRNA  
322 species and may benefit the bacterium by allowing for rapid evolution and diversification of gene  
323 regulation (34). The transcriptomic data suggested a variable length of the group I sRNAs and  
324 Northern blotting with a riboprobe hybridizing to the homologous region of group I sRNAs  
325 displayed multiple bands between 100-250 nt in length. The group I family of *A. baumannii* ATCC  
326 17978 sRNAs corresponds to the “C4-similar” group in *A. baumannii* 5075, reported previously  
327 to share regions of homology with bacteriophage P1 and P7 (37). Two of the group I *A. baumannii*  
328 ATCC 17978 sRNAs contained a 5' region with low sequence homology; the diversity in this  
329 region may provide these particular sRNAs with additional species-specific functions (Fig. 3B).

330 We next considered orthologs of sRNA that have been characterized in model species like  
331 *E. coli*. sRNA37 (119 nt) is predicted to be the 4.5S RNA of the signal recognition particle that is  
332 involved in membrane protein targeting. sRNA84 (182 nt) is predicted to be the 6S RNA that can  
333 bind and inhibit RNA polymerase in *E. coli* (4).

334 The RNA binding proteins Hfq, CsrA or ProQ coordinate binding of sRNAs to target  
335 mRNAs in *Enterobacteriaceae* (40-42). Of these three sRNA-binding proteins, only Hfq has been  
336 studied functionally in *Acinetobacter* spp. and only in *A. baylyi*. *A. baylyi* Hfq possesses an

337 unusually long, glycine-rich C-terminus that could alter Hfq function compared to what has been  
338 observed in model species (43). Thus, post-transcriptional regulation by Hfq and other RNA-  
339 binding proteins should be explored in *Acinetobacter* species.  
340

### 341 **Conservation of *Acinetobacter* small RNAs**

342 A gene conservation analysis was carried out by comparing the nucleotide sequence identity of the  
343 sRNAs identified in 17978-mff with 26 related bacterial genomes. The suite of 27 genomes  
344 contained fifteen *A. baumannii* strains, seven non-*baumannii* *Acinetobacter* species and five more  
345 distantly related members of the Pseudomonadales order (Fig. 4). The most highly conserved  
346 sRNA across all species were 4.5S RNA (sRNA37), 6S RNA (sRNA84) and to a lesser extent  
347 tmRNA (sRNA89). The conservation of *A. baumannii* sRNAs was much higher in the  
348 opportunistic pathogens *A. pittii* and *A. nosocomialis* showing a mean sequence identity across all  
349 110 sRNAs of ~87% for *A. pittii* and ~84% for *A. nosocomialis* compared to other *Acinetobacter*  
350 species (>70% mean sequence identity across 110 sRNAs). Environmental, non-pathogenic  
351 *Acinetobacter* species had lower mean sequence identity. Among the bacterial strains analyzed,  
352 eleven sRNAs were highly specific to *A. baumannii* (with less than 70% sequence identity across  
353 non-*A. baumannii* strains) and five sRNAs were only present in 17978 (sRNA11, sRNA23,  
354 sRNA52, sRNA82 and sRNA83). None of the 110 sRNA were highly conserved (> 75% sequence  
355 identity) in the more distantly related *Moraxella* or *Pseudomonas* species. We speculate that  
356 sRNAs conserved in *A. baumannii*, but absent from other species, may have evolved for roles in  
357 *A. baumannii* virulence or antibiotic resistance that future studies might address. The biological  
358 functions of *Acinetobacter* sRNAs may not easily be predicted due to the low level of sequence  
359 conservation between *Acinetobacter* sRNAs and well-characterized sRNAs from relatively  
360 closely-related *Pseudomonas* species.

### 361 **Functional genomics for the study of virulence and antimicrobial resistance in *A. baumannii***

362 *A. baumannii* is responsible for an increasing number of hospitalized cases of pneumonia leading  
363 to death, which has fueled efforts to identify genes that are important for virulence, host  
364 colonization and antimicrobial resistance. In a mouse model of *A. baumannii* pneumonia, genome-  
365 wide transposon mutagenesis followed by DNA sequencing (insertion sequencing) identified 157  
366 genes associated with *A. baumannii* persistence in the lung confirming the importance of known  
367 virulence genes and identifying several genes with no previous connection to *A. baumannii*  
368 infection (44). Our dataset builds upon this analysis by offering detailed molecular insights into  
369 the transcriptional architecture of important *A. baumannii* virulence factors. Here, we provide  
370 examples of how AcinetoCom can be used by researchers to evaluate transcriptional features of  
371 both well-characterized and novel virulence factors, and discuss the importance of *in vitro* growth  
372 conditions in the study of virulence gene expression (Table S4).

### 373 *Regulation of Zinc Acquisition and the Znu ABC Transporter*

374 Metal acquisition genes are a critical component in *A. baumannii* virulence as they are required to  
375 wrest essential co-factors from host chelators (4, 45, 46). Zinc limitation has been demonstrated  
376 as a central feature in controlling bacterial replication in the lung and dissemination to systemic  
377 sites in the murine model of *A. baumannii* pneumonia (45, 47). In *A. baumannii*, the Zur (zinc  
378 uptake regulator) transcriptional regulator is responsible for mediating the expression of several  
379 zinc-associated functions, including the repression of an ABC family zinc transporter encoded by  
380 *znuABC*. In *A. baumannii* 17978, the *zur* gene is co-transcribed as part of an operon with *znuCB*,  
381 which encode the cognate ATPase and permease protein of the ABC transporter (45). The third  
382 component, *znuA*, is found on the opposite DNA strand and encodes a substrate-binding protein  
383 (45). During growth in zinc-replete conditions, the Zur protein binds to a 19-bp operator site  
384 located 30 nucleotides upstream from the *znuA* translation start site and represses the expression  
385 of both *znuA* and the *zurznuCB* operon (45, 47).

386 TSSpredator identified a total of 8 TSS within the chromosomal region that includes both  
387 the *znuA* gene and *zurznuCB* operon (Fig. 5A). Two of the TSS were located 29 and 93 nucleotides  
388 upstream of the *znuA* ORF. While both TSS were annotated as antisense to the *zur* gene, their  
389 location within the intergenic region also make them prime candidates as primary or secondary  
390 TSS to *znuA*. No nearby TSS were predicted for the *zurznuCB* operon; however, manual inspection  
391 revealed potential primary and secondary TSS located 21 and 78 nucleotides upstream that were  
392 observable but not enriched in the TEX sample relative to the RNAPool sample. Based on these  
393 predictions, the TSS for *znuA* or *zurznuCB* are found on either side of the Zur-binding site and  
394 may represent an important regulatory feature for Zur-based transcription repression (45, 47). An  
395 additional TSS was identified within the *znuC* ORF, located 239 nucleotides upstream of *znuB*. To  
396 our knowledge, this TSS has not been previously identified in the well-characterized *zurznuCB*  
397 operon and suggests the potential for transcription of *znuB* independently from other members  
398 within the operon. Such a format of expression may be a mechanism for cells to accommodate  
399 modest increases in the intracellular level of zinc while avoiding simultaneous increases in the Zur  
400 protein. Further, there are no reports of a Zur box associated with the region surrounding this  
401 internal TSS. A Rho-independent transcriptional terminator is also present in this region, located  
402 within the *znuB* ORF or 113 nucleotides downstream of *znuC*. Several additional internal TSS  
403 were also identified within the *znuA* gene, but did not demonstrate a clear association with  
404 downstream genes or with an sRNA transcript. The remaining TSS within the region were  
405 annotated as antisense TSS and contribute to the overall theme of pervasive low-level antisense  
406 transcription within the *A. baumannii* transcriptome.

### 407 *The Membrane Lipid Asymmetry (Mla) Transport System*

408 Several of the genes responsible for *A. baumannii* persistence in the mouse pneumonia  
409 model were identified as belonging to efflux pump systems (44). The authors highlighted the Mla  
410 ATP-binding cassette (ABC) transport system because this system was annotated as conferring a  
411 toluene tolerance phenotype (48), raising the question of why resistance to organic solvents may

412 be important during infection of a mammalian host. However, recent studies have since uncovered  
413 a central role for Mla-mediated transport in maintaining the integrity of the outer membrane of  
414 Gram-negative bacteria (49, 50). Wang *et al.* reported a 15-fold decrease in *in vivo* persistence of  
415 mutants lacking *m1aA* (44), which correlates with roles for the Mla transport system in iron  
416 limitation and outer membrane vesicle formation as well as resistance to antibiotics such as  
417 doripenem and colistin (51-53).

418 Our transcriptomic data reveal that genes encoding the Mla ABC transporter components  
419 and periplasmic binding protein are co-transcribed in the *m1aFEDCB* operon (Fig. 5B). Similar to  
420 the *zurznuCB* operon, TSSpredator did not call a TSS upstream of this operon, but manual  
421 inspection of the TEX track revealed a single TSS located 29 nt upstream of *m1aF* at position  
422 419,650. We noted greater transcript abundance of *m1aDCB* (most notably *m1aCB*) compared to  
423 *m1aFE* in ESP, an expression pattern that was also observed for an LPS-deficient mutant of *A.*  
424 *baumannii* strain 19606 (51). As there is no additional promoter within the operon, this suggests  
425 that the *m1aDCB* portion of the transcript may turnover more slowly or is protected from  
426 degradation resulting in elevated production of the periplasmic substrate binding domain MlaC. A  
427 rho-independent terminator was identified downstream of the operon and provides a potential 3'  
428 border for the transcript; however, multiple rho-independent terminators were also identified  
429 within the operon, with two terminators present early in the *m1aF* and *m1aE* ORFs. Like *E. coli*  
430 and other Gram-negative bacteria, the *A. baumannii m1aA* homolog is found at a separate location  
431 on the chromosome (Fig. 5C) and we identified a single TSS for *m1aA*, located 74 nt upstream of  
432 the start codon. An additional antisense TSS was also identified, located opposite of the 3' end of  
433 the *m1aA* ORF. Both the *m1aFEDCB* and *m1aA* loci were expressed during ESP, suggesting that  
434 this growth condition could be used for further investigation of the transport system.

#### 435 *Chloramphenicol resistance is regulated by transcription initiation*

436 We discovered that *A. baumannii* 17978 cultured in M9 medium loses resistance to  
437 chloramphenicol (Fig. 6). All *A. baumannii* strains contain the chromosomally-encoded efflux  
438 pump CraA, for chloramphenicol resistance *Acinetobacter*. Efflux by CraA appears to be highly  
439 specific to chloramphenicol, conferring a minimum inhibitory concentration  $>256 \mu\text{g mL}^{-1}$   
440 chloramphenicol (54). Inhibition of CraA in *A. baumannii* strain 19606 increases sensitivity by  
441 32-fold while deletion of *craA* increases sensitivity by 128-fold, respectively (54). Expression of  
442 *craA* is highly consistent between strains of multi-drug resistant *A. baumannii* (55), but it is not  
443 known if this expression is constitutive in nature (56). In *A. baylyi*, a point mutation 12 bp upstream  
444 of the *craA* start codon caused increased stability of the *craA* mRNA resulting in higher *craA*  
445 expression and increased resistance to chloramphenicol (57).

446 We used dRNA-seq and quantitative PCR to examine the promoter architecture and  
447 regulation of *craA* in *A. baumannii* ATCC 17978, and tested whether loss of chloramphenicol  
448 resistance is coupled to altered expression of *craA* (Fig. 6A). dRNA-seq revealed two promoters  
449 at the *craA* gene, the gene-proximal TSS-1 promoter (position 367,680, Table S2) and the gene  
450 distal TSS-2 promoter (position 367,564, Table S2). To examine how *craA* expression is regulated

451 in response to growth conditions, we used qPCR to differentiate transcripts originating at TSS-1  
452 from TSS-2. Because TSS-1 is contained within TSS-2 transcripts, TSS-1 transcripts were  
453 calculated by subtracting TSS-2 transcripts from total *craA* transcripts. During steady-state rapid  
454 growth (exponential phase) in nutrient-rich L-broth, 92% of *craA* transcription originates at TSS-  
455 1 (Fig. 6A). Conversely, in the nutrient-poor medium M9 plus pyruvate, TSS-1 activity was  
456 undetectable and all transcription was driven by TSS-2. Next, we tested how the two promoters  
457 responded to nutrient downshift. Within four hours of transferring exponentially-growing cells  
458 from L-broth to M9 plus pyruvate, TSS-1 was down-regulated by 50-fold, whereas TSS-2 was  
459 down-regulated only 1.4-fold (Fig. 6B). Therefore, the promoter driving TSS-1 is highly  
460 responsive to nutritional quality of the growth medium. Over the following days, both promoters  
461 continued to decline in activity. TSS-1 has a poor match to the RpoD -35 consensus, suggesting  
462 that protein transcription factors control TSS-1 by recruiting RNAP to the promoter. The TSS-2  
463 promoter contains an archetypical -35 sequence, suggesting that RNAP can bind this promoter  
464 without assistance from an activator protein, which could explain the consistent expression of TSS-  
465 2 in L-broth and M9 medium.

466 We hypothesized that down-regulation of *craA* in M9 medium would result in a  
467 chloramphenicol-sensitive phenotype akin to that of a *craA* mutant strain. Thus, we evaluated the  
468 proportion of resistant and sensitive *A. baumannii* cells in liquid cultures. During exponential  
469 growth in rich medium (L-broth), all cells were resistant to chloramphenicol (Fig. 6B). All cells  
470 remained resistant at four hours after transfer to M9 medium, but 24 hours after transfer to minimal  
471 media, 50% of cells were susceptible. Cell viability was high after 96 hours in M9 medium, but  
472 chloramphenicol resistance had declined by more than 3,000-fold (Fig. 6B). Taken together, these  
473 results suggest that antibiotic resistance is conditional, especially when cells are instantly deprived  
474 of amino acids upon transfer from Lennox medium to M9 plus pyruvate medium. Although  
475 chloramphenicol resistance is ubiquitous in *A. baumannii* isolates due to drug efflux by CraA, we  
476 have discovered that *craA* expression—and thus chloramphenicol resistance—is conditional on  
477 nutritional quality of the environment. This lack of endogenous activation or repression of drug  
478 resistance presents a potential target for the effective treatment of multi-drug resistant infections  
479 with an inexpensive and widely available antibiotic.

## 480 CONCLUSION

481 As an emerging pathogen in the “omics” age, *A. baumannii* pathobiology is defined largely by  
482 high-throughput technologies that can guide molecular studies of pathogenicity mechanisms and  
483 antimicrobial resistance. We have conducted the first dRNA-seq analysis of the model strain *A.*  
484 *baumannii* ATCC 17978 to identify several thousand TSS at single nucleotide resolution, and  
485 generated a comprehensive map of the transcriptome that includes 110 sRNAs. Although 3731  
486 TSS is the largest and most precise dataset yet for *Acinetobacter*, it is important to note that  
487 computational identification of TSS can overlook true sites. TSS are only called where a sharp  
488 increase in read depth in the TEX-treated sample exceeds the normalized read depth in the Pool  
489 sample. Overall, we identified an average of 5.1 sense strand TSS/10 kbp in *A. baumannii* ATCC

490 17978, which is similar but fewer than the 7.0 sense strand TSS/10 kbp identified in *S.*  
491 *Typhimurium* 4/74 (11). Because manual curation of *S. Typhimurium* 4/74 identified more TSS  
492 per bp, we suspect the Predator program used here did not identify all TSS. Thus, scientists using  
493 AcinetoCom are encouraged to examine the RNA-seq read depth at their gene(s) of interest. A  
494 sharp increase in read depth in the TEX track alone can be highly suggestive of a TSS. Thus,  
495 investigators are advised to scrutinize cases where there is high expression in the ESP tracks but  
496 no TSS is called in the TEX track.

497 A growing body of evidence suggests a positive relationship between conditions that slow  
498 bacterial growth and the expression of virulence factors. For notable pathogens such as *Legionella*,  
499 *Yersinia*, and *Salmonella*, key virulence traits are induced during the early stationary phase in  
500 laboratory culture (10, 58-61). Expression of virulence determinants in standard laboratory  
501 conditions has permitted the study of gene function and characterization of the regulatory networks  
502 that control virulence gene expression in other model pathogens (62). It was fortuitous to discover  
503 that *A. baumannii* expresses key pathogenicity genes in standard laboratory conditions, including  
504 the three loci identified in the mouse model of pneumonia (4, 44) highlighted in Figure 5.  
505 Similarly, simple laboratory conditions revealed an environmental dimension to the control of drug  
506 resistance in *A. baumannii*. Although diagnostic techniques that test for the presence of antibiotic  
507 resistance genes can predict resistance, our finding of chloramphenicol sensitivity in a species that  
508 is considered highly chloramphenicol resistant illustrates the importance of characterizing gene  
509 expression and gene regulatory mechanisms. Reduced chloramphenicol efflux due to rapid down-  
510 regulation of *craA* expression presents two intriguing leads for combating this ubiquitous  
511 resistance mechanism in *A. baumannii*. First, characterization of the regulatory mechanism and  
512 identification of the environmental cues that stimulate or repress *craA* expression will raise the  
513 potential to predict stages of infection and locations in the host that *A. baumannii* may be sensitive  
514 to chloramphenicol. Second, elucidation of the transcription factors controlling *craA* may reveal  
515 additional drug targets that could be targeted synergistically. This could enhance the effectiveness  
516 of a widely available and inexpensive antibiotic that is being used effectively in the treatment of  
517 other multi-drug resistant infections.

## 518 **ACKNOWLEDGEMENTS**

519 This work was supported by funding from Saskatchewan Health Research Foundation (grant 2867)  
520 and Natural Sciences and Engineering Research Council of Canada (Discovery grant RGPIN-  
521 435784-2013) to ADSC. Saskatchewan Health Research Foundation (grant 3866) to KDM.

## 522 **REFERENCES**

- 523 1. World Health Organization (2017) Global Priority List of Antibiotic-Resistant Bacteria to  
524 Guide Research, Discovery, and Development of New Antibiotics. *Geneva: World Health*  
525 *Organization*.
- 526 2. Spellberg, B. and Rex, J.H. (2013) The value of single-pathogen antibacterial agents. *Nat Rev*  
527 *Drug Discov*, **12**, 963–963.

- 528 3. McConnell,M.J., Actis,L. and Pachón,J. (2013) *Acinetobacter baumannii*: human infections,  
529 factors contributing to pathogenesis and animal models. *FEMS Microbiology Reviews*, **37**,  
530 130–155.
- 531 4. Kröger,C., Kary,S.C., Schauer,K. and Cameron,A.D.S. (2016) Genetic Regulation of  
532 Virulence and Antibiotic Resistance in *Acinetobacter baumannii*. *Genes*, **8**, 12–19.
- 533 5. Colgan,A.M., Cameron,A.D. and Kröger,C. (2017) If it transcribes, we can sequence it:  
534 mining the complexities of host-pathogen-environment interactions using RNA-seq. *Current*  
535 *Opinion in Microbiology*, **36**, 37–46.
- 536 6. Saliba,A.-E., C Santos,S. and Vogel,J. (2017) New RNA-seq approaches for the study of  
537 bacterial pathogens. *Current Opinion in Microbiology*, **35**, 78–87.
- 538 7. Smith,M.G., Gianoulis,T.A., Pukatzki,S., Mekalanos,J.J., Ornston,L.N., Gerstein,M. and  
539 Snyder,M. (2007) New insights into *Acinetobacter baumannii* pathogenesis revealed by  
540 high-density pyrosequencing and transposon mutagenesis. *Genes & Development*, **21**, 601–  
541 614.
- 542 8. Jacobs,A.C., Thompson,M.G., Black,C.C., Kessler,J.L., Clark,L.P., McQueary,C.N.,  
543 Gancz,H.Y., Corey,B.W., Moon,J.K., Si,Y., *et al.* (2014) AB5075, a Highly Virulent Isolate  
544 of *Acinetobacter baumannii*, as a Model Strain for the Evaluation of Pathogenesis and  
545 Antimicrobial Treatments. *mBio*, **5**, e01076–14.
- 546 9. Sharma,C.M., Hoffmann,S., Darfeuille,F., Reignier,J., Findeiß,S., Sittka,A., Chabas,S.,  
547 Reiche,K., Hackermüller,J., Reinhardt,R., *et al.* (2010) The primary transcriptome of the  
548 major human pathogen *Helicobacter pylori*. *Nature*, **464**, 250–255.
- 549 10. Kröger,C., Dillon,S.C., Cameron,A.D.S., Papenfort,K., Sivasankaran,S.K., Hokamp,K.,  
550 Chao,Y., Sittka,A., Hébrard,M., Händler,K., *et al.* (2012) The transcriptional landscape and  
551 small RNAs of *Salmonella enterica* serovar Typhimurium. *Proc. Natl. Acad. Sci. U.S.A.*,  
552 **109**, E1277–86.
- 553 11. Kröger,C., Colgan,A., Srikumar,S., Händler,K., Sivasankaran,S.K., Hammarlöf,D.L.,  
554 Canals,R., Grissom,J.E., Conway,T., Hokamp,K., *et al.* (2013) An Infection-Relevant  
555 Transcriptomic Compendium for *Salmonella enterica* Serovar Typhimurium. *Cell Host and*  
556 *Microbe*, **14**, 683–695.
- 557 12. Weber,B.S., Ly,P.M., Irwin,J.N., Pukatzki,S. and Feldman,M.F. (2015) A multidrug  
558 resistance plasmid contains the molecular switch for type VI secretion in *Acinetobacter*  
559 *baumannii*. *Proceedings of the National Academy of Sciences*, **112**, 9442–9447.
- 560 13. Langmead,B. and Salzberg,S.L. (2012) Fast gapped-read alignment with Bowtie 2. *Nat.*  
561 *Methods*, **9**, 357–359.
- 562 14. Li,H., Handsaker,B., Wysoker,A., Fennell,T., Ruan,J., Homer,N., Marth,G., Abecasis,G.,  
563 Durbin,R.1000 Genome Project Data Processing Subgroup (2009) The Sequence  
564 Alignment/Map format and SAMtools. *Bioinformatics*, **25**, 2078–2079.

- 565 15. Afgan,E., Baker,D., van den Beek,M., Blankenberg,D., Bouvier,D., Čech,M., Chilton,J.,  
566 Clements,D., Coraor,N., Eberhard,C., *et al.* (2016) The Galaxy platform for accessible,  
567 reproducible and collaborative biomedical analyses: 2016 update. *Nucleic Acids Research*,  
568 **44**, W3–W10.
- 569 16. Nicol,J.W., Helt,G.A., Blanchard,S.G., Raja,A. and Loraine,A.E. (2009) The Integrated  
570 Genome Browser: free software for distribution and exploration of genome-scale datasets.  
571 *Bioinformatics*, **25**, 2730–2731.
- 572 17. Skinner,M.E., Uzilov,A.V., Stein,L.D., Mungall,C.J. and Holmes,I.H. (2009) JBrowse: a  
573 next-generation genome browser. *Genome Res.*, **19**, 1630–1638.
- 574 18. Liao,Y., Smyth,G.K. and Shi,W. (2014) featureCounts: an efficient general purpose program  
575 for assigning sequence reads to genomic features. *Bioinformatics*, **30**, 923–930.
- 576 19. Li,B., Ruotti,V., Stewart,R.M., Thomson,J.A. and Dewey,C.N. (2009) RNA-Seq gene  
577 expression estimation with read mapping uncertainty. *Bioinformatics*, **26**, 493–500.
- 578 20. Dugar,G., Herbig,A., Förstner,K.U., Heidrich,N., Reinhardt,R., Nieselt,K. and Sharma,C.M.  
579 (2013) High-Resolution Transcriptome Maps Reveal Strain-Specific Regulatory Features of  
580 Multiple *Campylobacter jejuni* Isolates. *PLoS Genet*, **9**, e1003495–15.
- 581 21. Bailey,T.L., Williams,N., Misleh,C. and Li,W.W. (2006) MEME: discovering and analyzing  
582 DNA and protein sequence motifs. *Nucleic Acids Research*, **34**, W369–73.
- 583 22. Crooks,G.E., Hon,G., Chandonia,J.-M. and Brenner,S.E. (2004) WebLogo: a sequence logo  
584 generator. *Genome Res.*, **14**, 1188–1190.
- 585 23. Naville,M., Ghuillot-Gaudeffroy,A., Marchais,A. and Gautheret,D. (2014) ARNold: A web  
586 tool for the prediction of Rho-independent transcription terminators. *RNA Biology*, **8**, 11–13.
- 587 24. Pearson,W.R. (2001) FASTA Search Programs John Wiley & Sons, Ltd, Chichester, UK.
- 588 25. Tedin,K. and Bläsi,U. (1996) The RNA chain elongation rate of the lambda late mRNA is  
589 unaffected by high levels of ppGpp in the absence of amino acid starvation. *Journal of*  
590 *Biological Chemistry*, **271**, 17675–17686.
- 591 26. Eriksson,S., Lucchini,S., Thompson,A., Rhen,M. and Hinton,J.C.D. (2003) Unravelling the  
592 biology of macrophage infection by gene expression profiling of intracellular *Salmonella*  
593 *enterica*. *Molecular Microbiology*, **47**, 103–118.
- 594 27. Camarena,L., Bruno,V., Euskirchen,G., Poggio,S. and Snyder,M. (2010) Molecular  
595 mechanisms of ethanol-induced pathogenesis revealed by RNA-sequencing. *PLoS Pathog*, **6**,  
596 e1000834.
- 597 28. Haas,B.J., Chin,M., Nusbaum,C., Birren,B.W. and Livny,J. (2012) How deep is deep enough  
598 for RNA-Seq profiling of bacterial transcriptomes? *BMC Genomics*, **13**, 734.



- 599 29. Raghavan,R., Sloan,D.B. and Ochman,H. (2012) Antisense transcription is pervasive but  
600 rarely conserved in enteric bacteria. *mBio*, **3**, e00156–12–e00156–12.
- 601 30. Lloréns-Rico,V., Cano,J., Kamminga,T., Gil,R., Latorre,A., Chen,W.-H., Bork,P., Glass,J.I.,  
602 Serrano,L. and Lluch-Senar,M. (2016) Bacterial antisense RNAs are mainly the product of  
603 transcriptional noise. *Sci Adv*, **2**, e1501363–e1501363.
- 604 31. Lybecker,M., Bilusic,I. and Raghavan,R. (2014) Pervasive transcription: detecting functional  
605 RNAs in bacteria. *Transcription*, **5**, e944039.
- 606 32. Davis,M.C., Kesthely,C.A., Franklin,E.A. and MacLellan,S.R. (2017) The essential activities  
607 of the bacterial sigma factor. *Can. J. Microbiol.*, **63**, 89–99.
- 608 33. Del Campo,C., Bartholomäus,A., Fedyunin,I. and Ignatova,Z. (2015) Secondary Structure  
609 across the Bacterial Transcriptome Reveals Versatile Roles in mRNA Regulation and  
610 Function. *PLoS Genet*, **11**, e1005613.
- 611 34. Wagner,E.G.H. and Romby,P. (2015) Small RNAs in bacteria and archaea: who they are,  
612 what they do, and how they do it. *Adv. Genet.*, **90**, 133–208.
- 613 35. Nitzan,M., Rehani,R. and Margalit,H. (2017) Integration of Bacterial Small RNAs in  
614 Regulatory Networks. *Annu Rev Biophys*, **46**, 131–148.
- 615 36. Sharma,R., Arya,S., Patil,S.D., Sharma,A., Jain,P.K., Navani,N.K. and Pathania,R. (2014)  
616 Identification of Novel Regulatory Small RNAs in *Acinetobacter baumannii*. *PLoS ONE*, **9**,  
617 e93833–15.
- 618 37. Weiss,A., Broach,W.H., Lee,M.C. and Shaw,L.N. (2016) Towards the complete small  
619 RNome of *Acinetobacter baumannii*. *Microb Genom*, **2**, e000045.
- 620 38. Chao,Y., Papenfort,K., Reinhardt,R., Sharma,C.M. and Vogel,J. (2012) An atlas of Hfq-  
621 bound transcripts reveals 3' UTRs as a genomic reservoir of regulatory small RNAs. *EMBO*  
622 *J.*, **31**, 4005–4019.
- 623 39. Miyakoshi,M., Chao,Y. and Vogel,J. (2015) Regulatory small RNAs from the 3' regions of  
624 bacterial mRNAs. *Current Opinion in Microbiology*, **24**, 132–139.
- 625 40. Updegrave,T.B., Zhang,A. and Storz,G. (2016) Hfq: the flexible RNA matchmaker. *Current*  
626 *Opinion in Microbiology*, **30**, 133–138.
- 627 41. Vogel,J. and Ben F Luisi (2011) Hfq and its constellation of RNA. *Nat. Rev. Microbiol.*, **9**,  
628 578–589.
- 629 42. Smirnov,A., Wang,C., Drewry,L.L. and Vogel,J. (2017) Molecular mechanism of mRNA  
630 repression in trans by a ProQ-dependent small RNA. *EMBO J.*, **36**, 1029–1045.
- 631 43. Schilling,D. and Gerischer,U. (2009) The *Acinetobacter baylyi* Hfq gene encodes a large  
632 protein with an unusual C terminus. *Journal of Bacteriology*, **191**, 5553–5562.

- 633 44. Wang,N., Ozer,E.A., Mandel,M.J. and Hauser,A.R. (2014) Genome-wide identification of  
634 *Acinetobacter baumannii* genes necessary for persistence in the lung. *mBio*, **5**, e01163–14.
- 635 45. Hood,M.I., Mortensen,B.L., Moore,J.L., Zhang,Y., Kehl-Fie,T.E., Sugitani,N., Chazin,W.J.,  
636 Caprioli,R.M. and Skaar,E.P. (2012) Identification of an *Acinetobacter baumannii* Zinc  
637 Acquisition System that Facilitates Resistance to Calprotectin-mediated Zinc Sequestration.  
638 *PLoS Pathog*, **8**, e1003068–17.
- 639 46. Mortensen,B.L. and Skaar,E.P. (2013) The contribution of nutrient metal acquisition and  
640 metabolism to *Acinetobacter baumannii* survival within the host. *Front. Cell. Infect.*  
641 *Microbiol.*, **3**.
- 642 47. Mortensen,B.L., Rathi,S., Chazin,W.J. and Skaar,E.P. (2014) *Acinetobacter baumannii*  
643 Response to Host-Mediated Zinc Limitation Requires the Transcriptional Regulator Zur.  
644 *Journal of Bacteriology*, **196**, 2616–2626.
- 645 48. Kim,K., Lee,S., Lee,K. and Lim,D. (1998) Isolation and characterization of toluene-sensitive  
646 mutants from the toluene-resistant bacterium *Pseudomonas putida* GM73. *Journal of*  
647 *Bacteriology*, **180**, 3692–3696.
- 648 49. Malinverni,J.C. and Silhavy,T.J. (2009) An ABC transport system that maintains lipid  
649 asymmetry in the gram-negative outer membrane. *Proc. Natl. Acad. Sci. U.S.A.*, **106**, 8009–  
650 8014.
- 651 50. Henderson,J.C., Zimmerman,S.M., Crofts,A.A., Boll,J.M., Kuhns,L.G., Herrera,C.M. and  
652 Trent,M.S. (2016) The Power of Asymmetry: Architecture and Assembly of the Gram-  
653 Negative Outer Membrane Lipid Bilayer. *Annu. Rev. Microbiol.*, **70**, 255–278.
- 654 51. Henry,R., Vithanage,N., Harrison,P., Seemann,T., Coutts,S., Moffatt,J.H., Nation,R.L., Li,J.,  
655 Harper,M., Adler,B., *et al.* (2012) Colistin-resistant, lipopolysaccharide-deficient  
656 *Acinetobacter baumannii* responds to lipopolysaccharide loss through increased expression  
657 of genes involved in the synthesis and transport of lipoproteins, phospholipids, and poly- $\beta$ -  
658 1,6-N-acetylglucosamine. *Antimicrobial Agents and Chemotherapy*, **56**, 59–69.
- 659 52. Henry,R., Crane,B., Powell,D., Deveson Lucas,D., Li,Z., Aranda,J., Harrison,P., Nation,R.L.,  
660 Adler,B., Harper,M., *et al.* (2015) The transcriptomic response of *Acinetobacter baumannii*  
661 to colistin and doripenem alone and in combination in an  
662 vitropharmacokinetics/pharmacodynamics model. *Journal of Antimicrobial Chemotherapy*,  
663 **70**, 1303–1313.
- 664 53. Nhu,N.T.K., Riordan,D.W., Do Hoang Nhu,T., Thanh,D.P., Thwaites,G., Lan,N.P.H.,  
665 Wren,B.W., Baker,S. and Stabler,R.A. (2016) The induction and identification of novel  
666 Colistin resistance mutations in *Acinetobacter baumannii* and their implications. *Nature*  
667 *Publishing Group*, **6**, 1–8.
- 668 54. Roca,I., Marti,S., Espinal,P., Martínez,P., Gibert,I. and Vila,J. (2009) CraA, a major  
669 facilitator superfamily efflux pump associated with chloramphenicol resistance in  
670 *Acinetobacter baumannii*. *Antimicrobial Agents and Chemotherapy*, **53**, 4013–4014.

- 671 55. Lin,M.-F., Lin,Y.-Y., Tu,C.-C. and Lan,C.-Y. (2017) Distribution of different efflux pump  
672 genes in clinical isolates of multidrug-resistant *Acinetobacter baumannii* and their  
673 correlation with antimicrobial resistance. *Journal of Microbiology, Immunology and*  
674 *Infection*, **50**, 224–231.
- 675 56. Coyne,S., Courvalin,P. and Périchon,B. (2011) Efflux-mediated antibiotic resistance in  
676 *Acinetobacter* spp. *Antimicrobial Agents and Chemotherapy*, **55**, 947–953.
- 677 57. Brzoska,A.J., Hassan,K.A., de Leon,E.J., Paulsen,I.T. and Lewis,P.J. (2013) Single-step  
678 selection of drug resistant *Acinetobacter baylyi* ADP1 mutants reveals a functional  
679 redundancy in the recruitment of multidrug efflux systems. *PLoS ONE*, **8**, e56090.
- 680 58. Song,M., Kim,H.-J., Kim,E.Y., Shin,M., Lee,H.C., Hong,Y., Rhee,J.H., Yoon,H., Ryu,S.,  
681 Lim,S., *et al.* (2004) ppGpp-dependent Stationary Phase Induction of Genes on *Salmonella*  
682 Pathogenicity Island 1. *Journal of Biological Chemistry*, **279**, 34183–34190.
- 683 59. Lee,C.A. and Falkow,S. (1990) The ability of *Salmonella* to enter mammalian cells is  
684 affected by bacterial growth state. *Proceedings of the National Academy of Sciences*, **87**,  
685 4304–4308.
- 686 60. Pepe,J.C., Badger,J.L. and Miller,V.L. (1994) Growth phase and low pH affect the thermal  
687 regulation of the *Yersinia enterocolitica* *inv* gene. *Molecular Microbiology*, **11**, 123–135.
- 688 61. Potrykus,K. and Cashel,M. (2008) (p)ppGpp: Still Magical? *Annu. Rev. Microbiol.*, **62**, 35–  
689 51.
- 690 62. Golubeva,Y.A., Sadik,A.Y., Ellermeier,J.R. and Slauch,J.M. (2012) Integrating global  
691 regulatory input into the *Salmonella* pathogenicity island 1 type III secretion system.  
692 *Genetics*, **190**, 79–90.

693

## 694 FIGURES AND TABLES

695 **Figure 1. Chromosomal location of coding sequences, small RNAs and transcriptional start**  
696 **sites of *A. baumannii* ATCC 17978-mff.** Coding sequences are depicted in blue and red (plus and  
697 minus strand), small RNAs in light blue (plus strand) and light red (minus strand) and TSS in grey  
698 (outer dark grey ring: TSS on the plus strand, inner light grey ring TSS on the minus strand). The  
699 figure was created using Circa (OMGenomics, <http://omgenomics.com/circa/>).

700

701 **Figure 2. Characterization of transcription start sites. (A)** Schematic explaining TSS  
702 categories. P: Primary TSS, S: Secondary TSS, I: Internal TSS, A: Antisense TSS, O: Orphan TSS.  
703 **(B)** Pie chart showing the number of TSS per category. **(C)** Histogram showing the number and  
704 length of 5' UTRs of primary (red) and secondary (black) TSS. The inset illustrates the frequency  
705 of occurrence of nucleotides around the transcriptional start site. **(D)** Meme-derived motifs  
706 showing –35 and –10 region of *A. baumannii* 17978 promoters.

707  
708 **Figure 3. sRNA in *A. baumannii* ATCC 17978.** (A) Normalized, mapped sequence reads from  
709 RNA-seq show the expression of sRNAs 17, 37, 75, 76, 77, 84, 99 and 100 (yellow arrows).  
710 Curved arrows depict TSS identified in this study and lollipop structures are predicted rho-  
711 independent terminators. Northern blotting of selected sRNAs are shown to the right. RNA was  
712 isolated from ESP and five  $\mu\text{g}$  of total RNA was loaded per lane. The sRNA sizes below the  
713 individual blots have been predicted from (d)RNA-seq data. (B) Sequence alignment of Group I  
714 and Group III sRNAs created with the Geneious Software (v. 8.1.8); coloured bases indicate  
715 conservation in at least 50% of aligned sequences (A, red; C, blue; G, yellow; T, green). The  
716 riboprobes used in Northern blotting are depicted as black bars atop the sRNA alignments.

717  
718 **Figure 4. sRNA conservation in representative members of the order Pseudomonadales.**  
719 Genomes of multiple *Acinetobacter* species, *Pseudomonas* species, and *Moraxella catarrhalis*  
720 were compared using GLSEARCH. The colour scale shows the percentage sequence identity of  
721 the 110 sRNAs compared to the reference sequence from *A. baumannii* ATCC 17978.

722  
723 **Figure 5. RNA-seq analysis of *znu* and *mfa* virulence operon gene expression.** Mapped,  
724 normalized RNA-seq reads illustrate the quantitative measure of expression. Right-angle arrows  
725 indicate TSS, which are colour-coded to correspond with the TSS categories described in figure 2.  
726 The lollipop structures represent predicted rho-independent transcriptional terminators.

727  
728 **Figure 6. Elucidation of transcriptional control of chloramphenicol resistance.** (A)  
729 Normalized, mapped sequence reads from dRNA-seq of the RNA pool (upper panel). Right-angle  
730 arrows indicate the two TSS identified in the promoter region of the chloramphenicol efflux pump  
731 gene, *craA*. The lollipop structure represents a predicted rho-independent transcriptional  
732 terminator. Transcript abundance was quantified for TSS-1 or TSS-2 and expressed relative to total  
733 transcript abundance in cells growing exponentially in LB medium, with predicted  $-10$  and  $-35$   
734 RNAP binding sites. (B) Growth experiment of *A. baumannii* in M9 over 96 hours. At the indicated  
735 time points, *A. baumannii* cells were plated on LB agar (Total cells) or LB + chloramphenicol  
736 (Resistant cells). Transcript abundance of *craA* mRNA originating from TSS-1 or TSS-1+2  
737 measured by qPCR at 0, 4, 24 and 48 hours.

738  
739 **Table 1. Growth Conditions Used to Induce the Global *A. baumannii* Transcriptome**

740 **Table S1. Oligonucleotides Used in this Study**

741 **Table S2. Transcriptional Start Sites of *A. baumannii* str. 17978-mff**

742 **Table S3. sRNAs of *A. baumannii* str. 17978-mff**

743 **Table S4. Expression data**

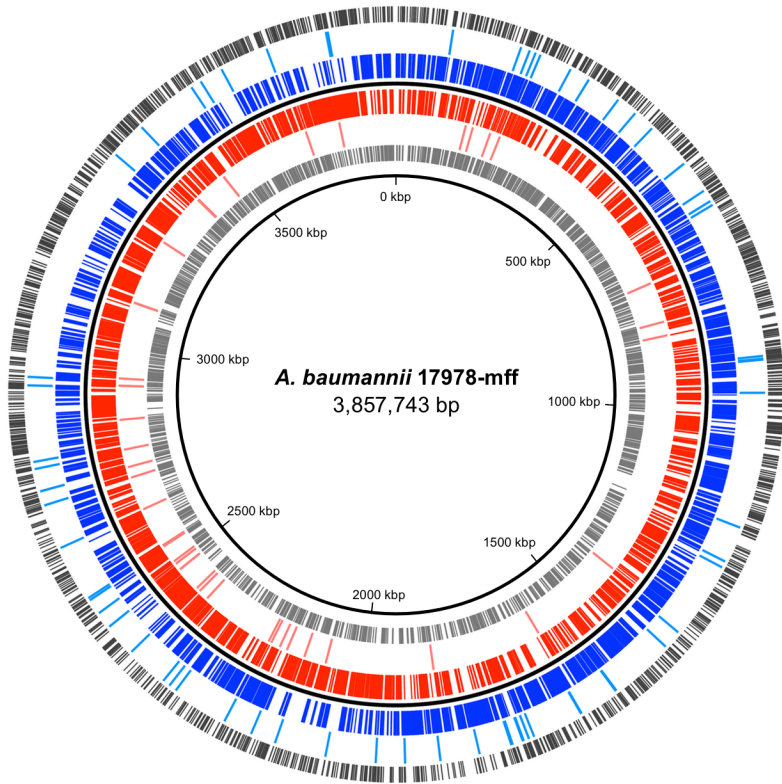

### Plus Strand

- Transcriptional Start Sites (TSS)
- Small RNAs (sRNAs)
- Coding Sequences

### Minus Strand

- Coding Sequences
- Small RNAs (sRNAs)
- Transcriptional Start Sites (TSS)

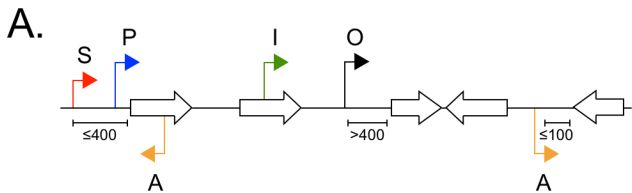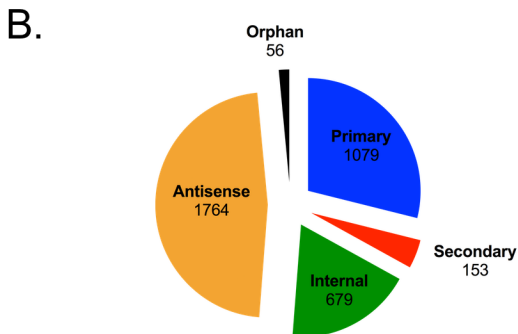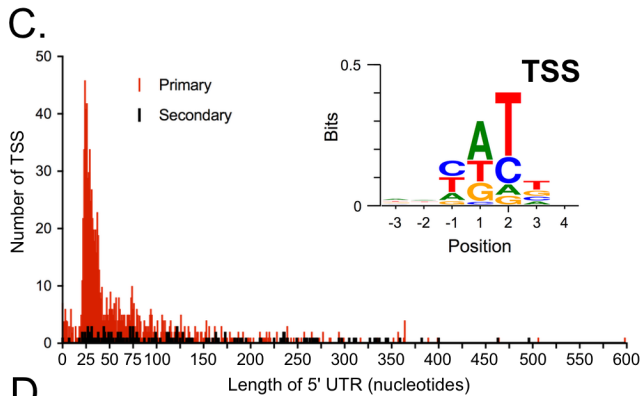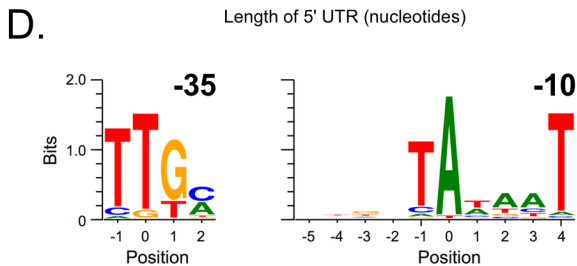

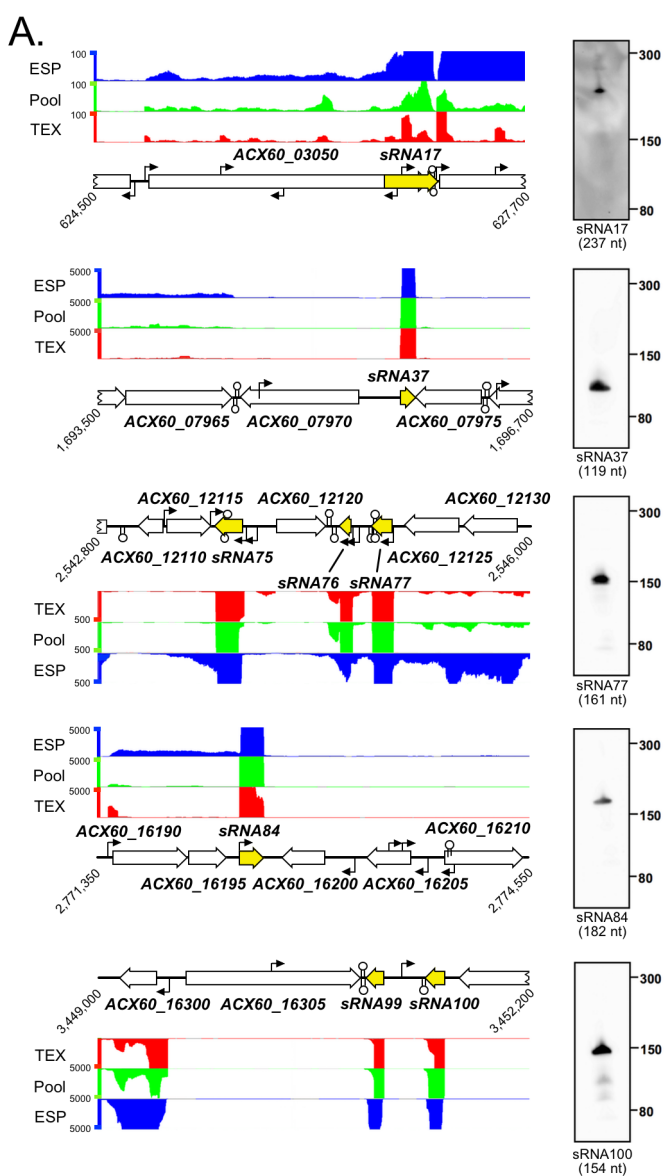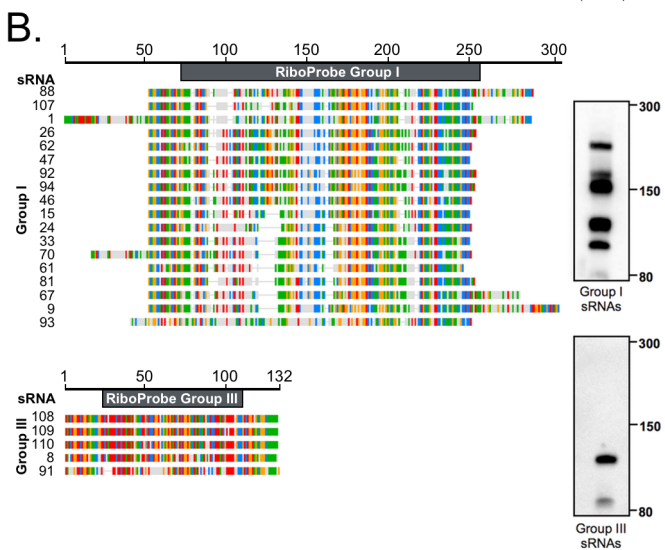

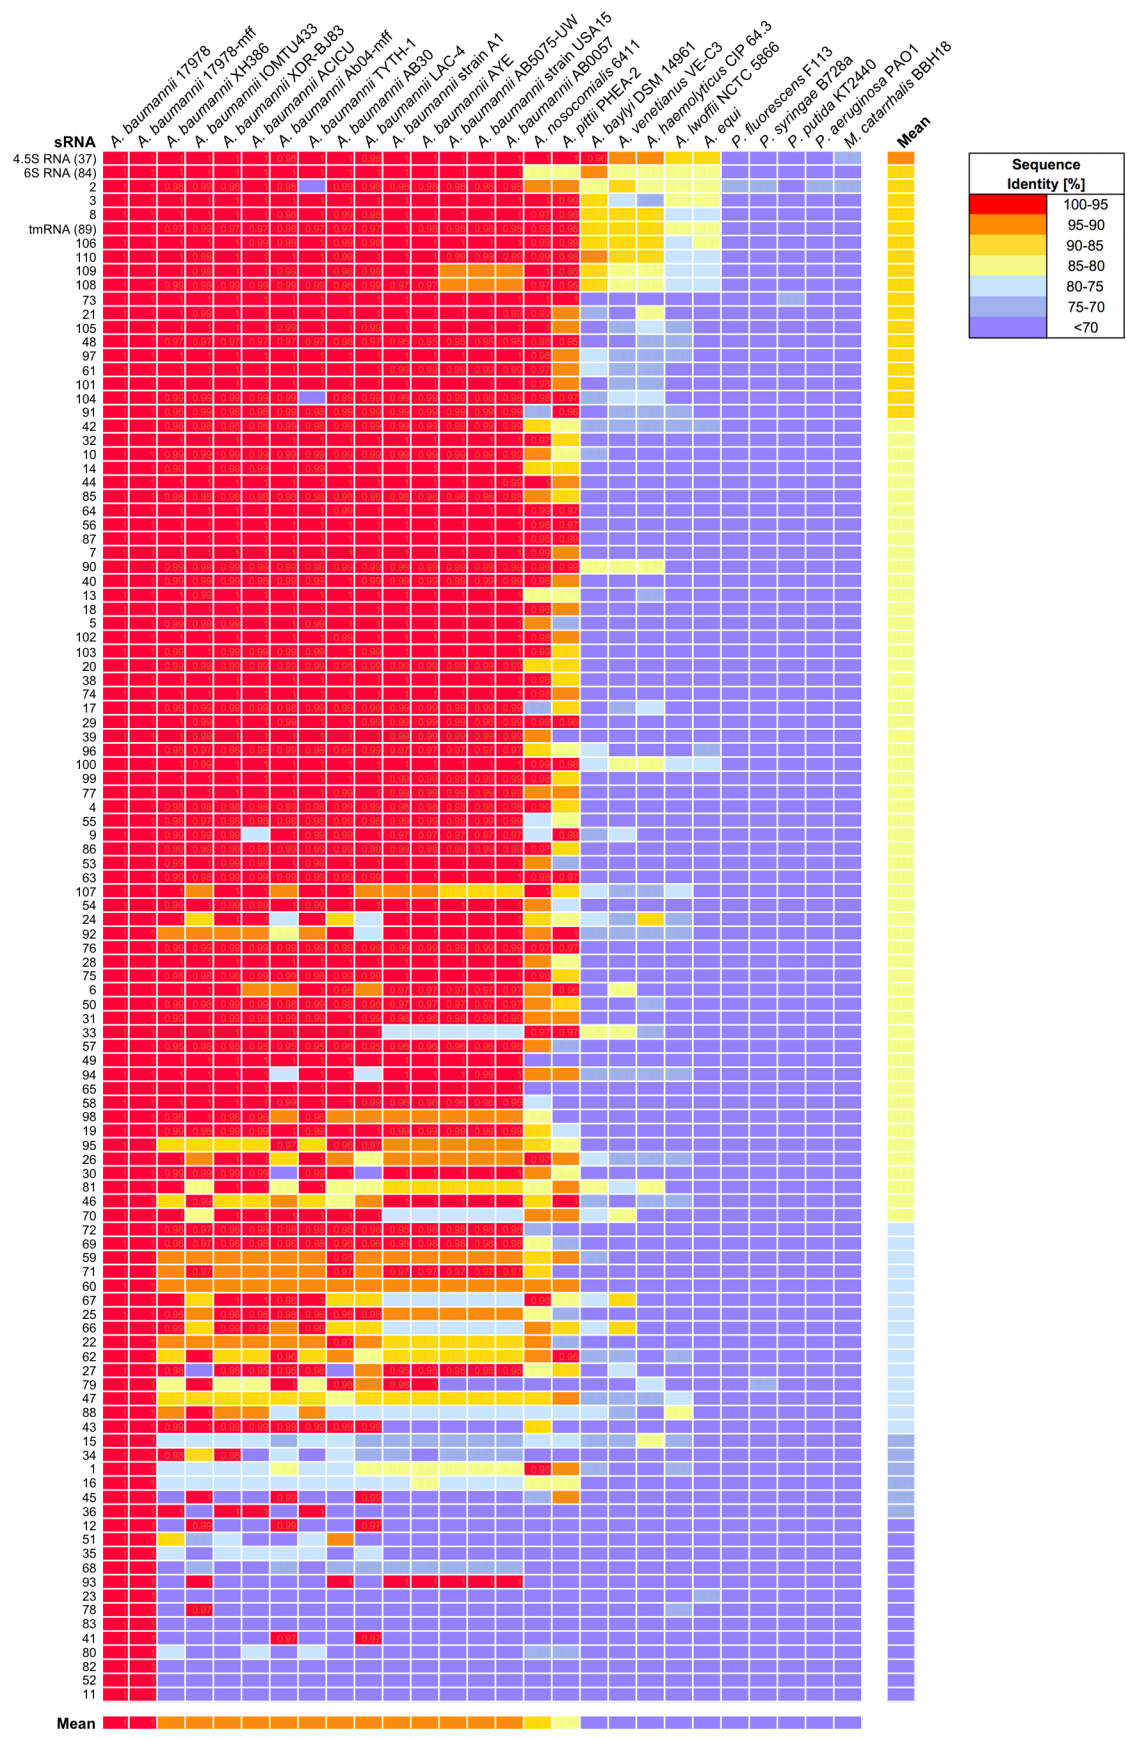



**A.*****znuA-zurznuCB* (ACX60\_17345-17360)**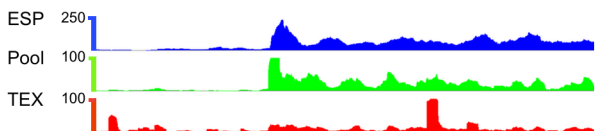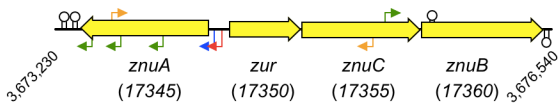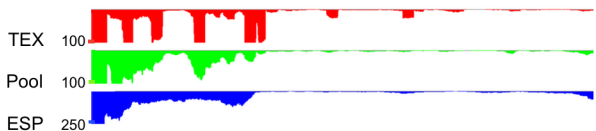**B.*****miaFEDCB* (ACX60\_01980-02000)**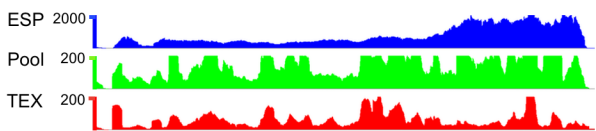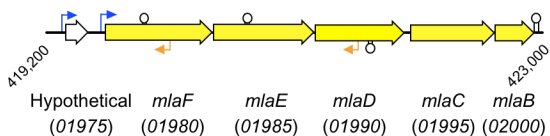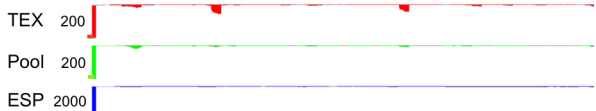**C.*****miaA* (ACX60\_15005)**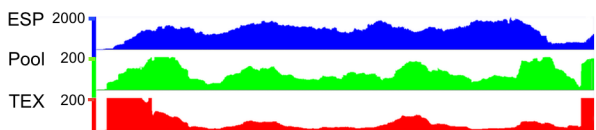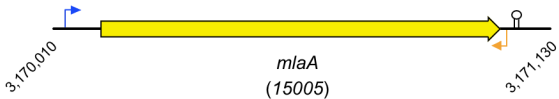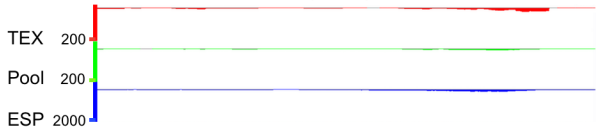

A.

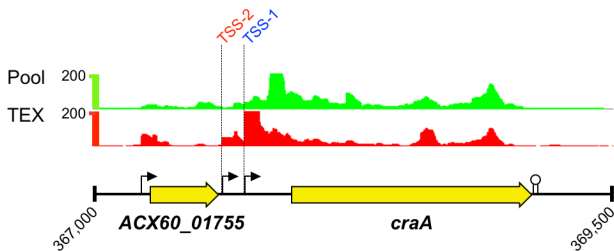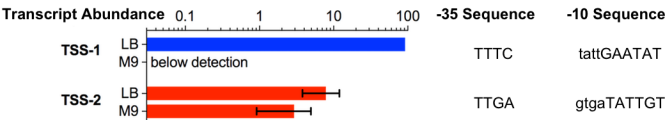

B.

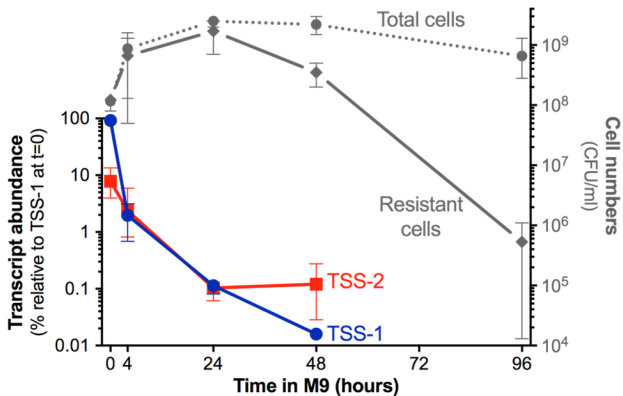

Source: http://biorxiv.org/content/10.1101/236794v1.full.pdf
